# Supplementary material for: ΦCrAss001 represents the most abundant bacteriophage family in the human gut and infects Bacteroides intestinalis
Source: PubMed Central journal article supplement (PMC6235969; doi:10.1038/s41467-018-07225-7), 2018-11-14
Supplement: 41467_2018_7225_MOESM1_ESM.pdf [file 41467_2018_7225_MOESM1_ESM.pdf]

## Supplementary Figures

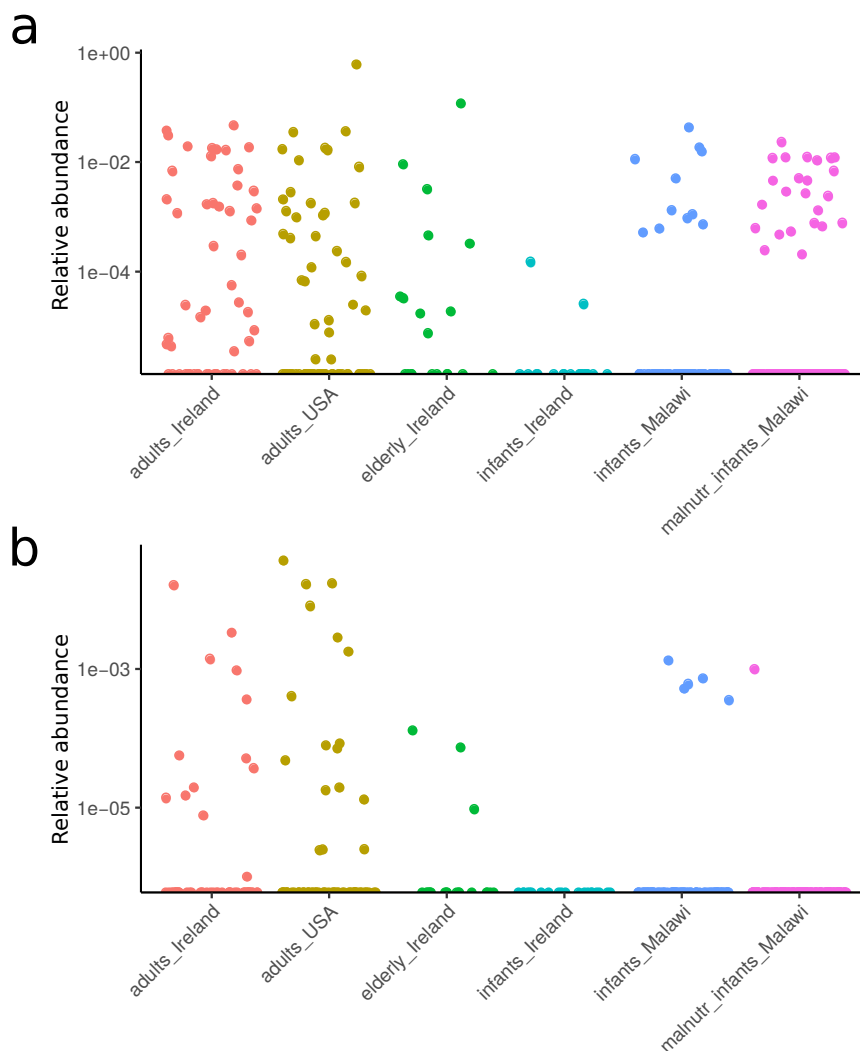

**Supplementary Figure 1. Incidence of  $\Phi$ crAss001 and related bacteriophages in the human faecal viromes.** **A**, cumulative relative abundance (fraction of reads aligned) of different IAS-virus like phage contigs in several faecal virome metagenomic sequencing datasets<sup>1-3</sup>; **B**, relative abundance of  $\Phi$ crAss001 in the same datasets.

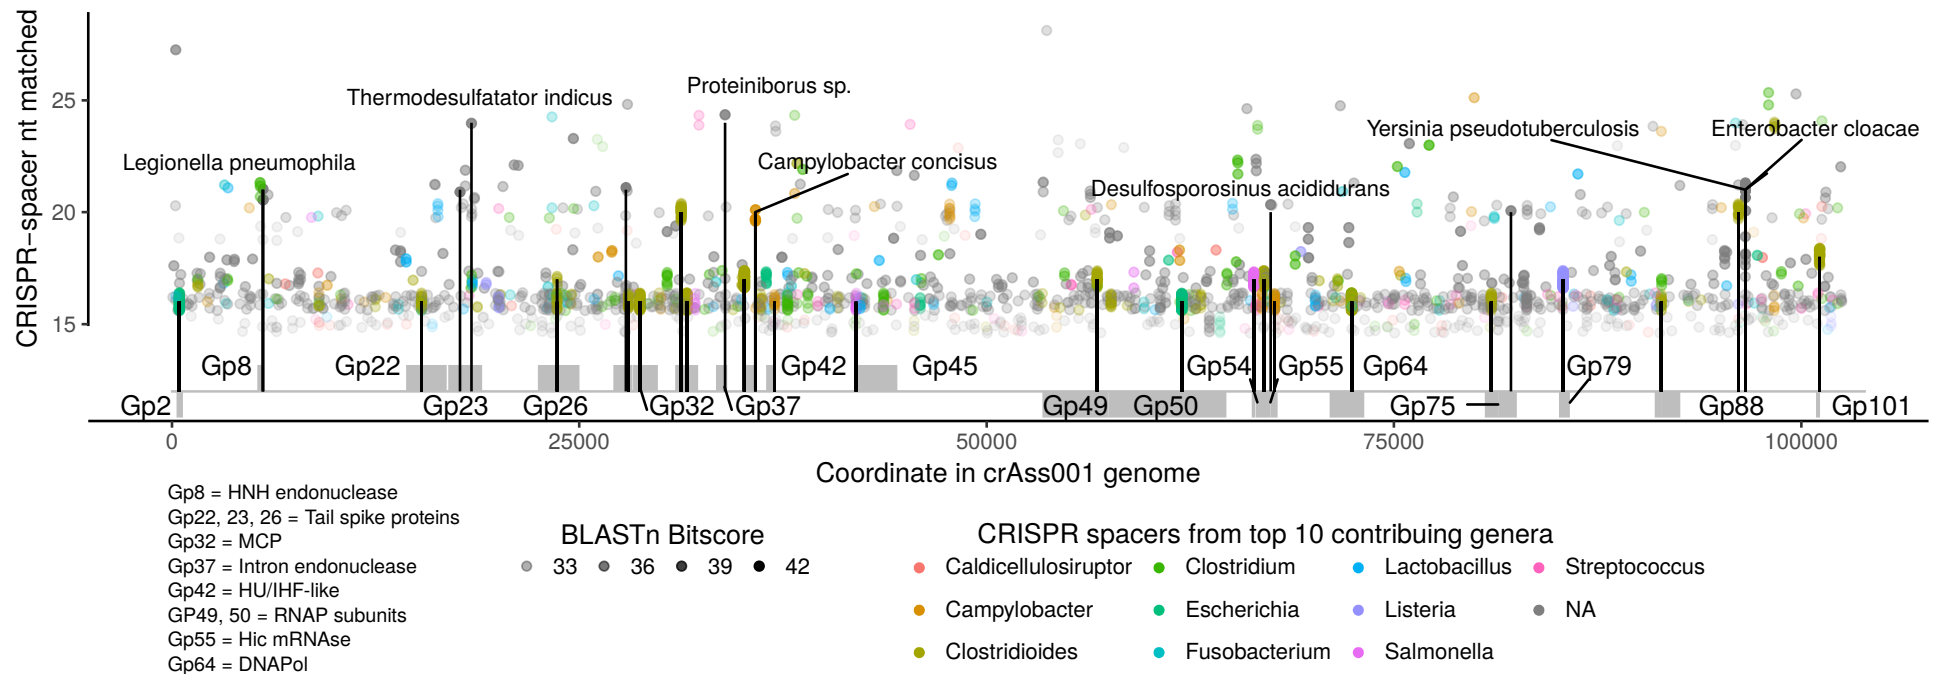

**Supplementary Figure 2. Distribution of BLASTn hits of CRISPR spacers from 5,591 bacterial genomes on the  $\Phi$ crAss001 genome map.**

Dots indicate individual CRISPR spacer sequences (best 3000 hits, dot intensity proportional to the BLASTn Bitscore); coloured dots correspond to top 10 contributing bacterial genera; vertical lines highlight either top scoring hits (Bitscore > 20, e-value < 0.001, dubbed with species of origin name) or hotspots with >10 hits at same coordinate; grey blocks represent ORFs in which top-scoring hits or hotspots are located; + strand ORFs are located above the centre line, - strand ORFs are located beneath it.

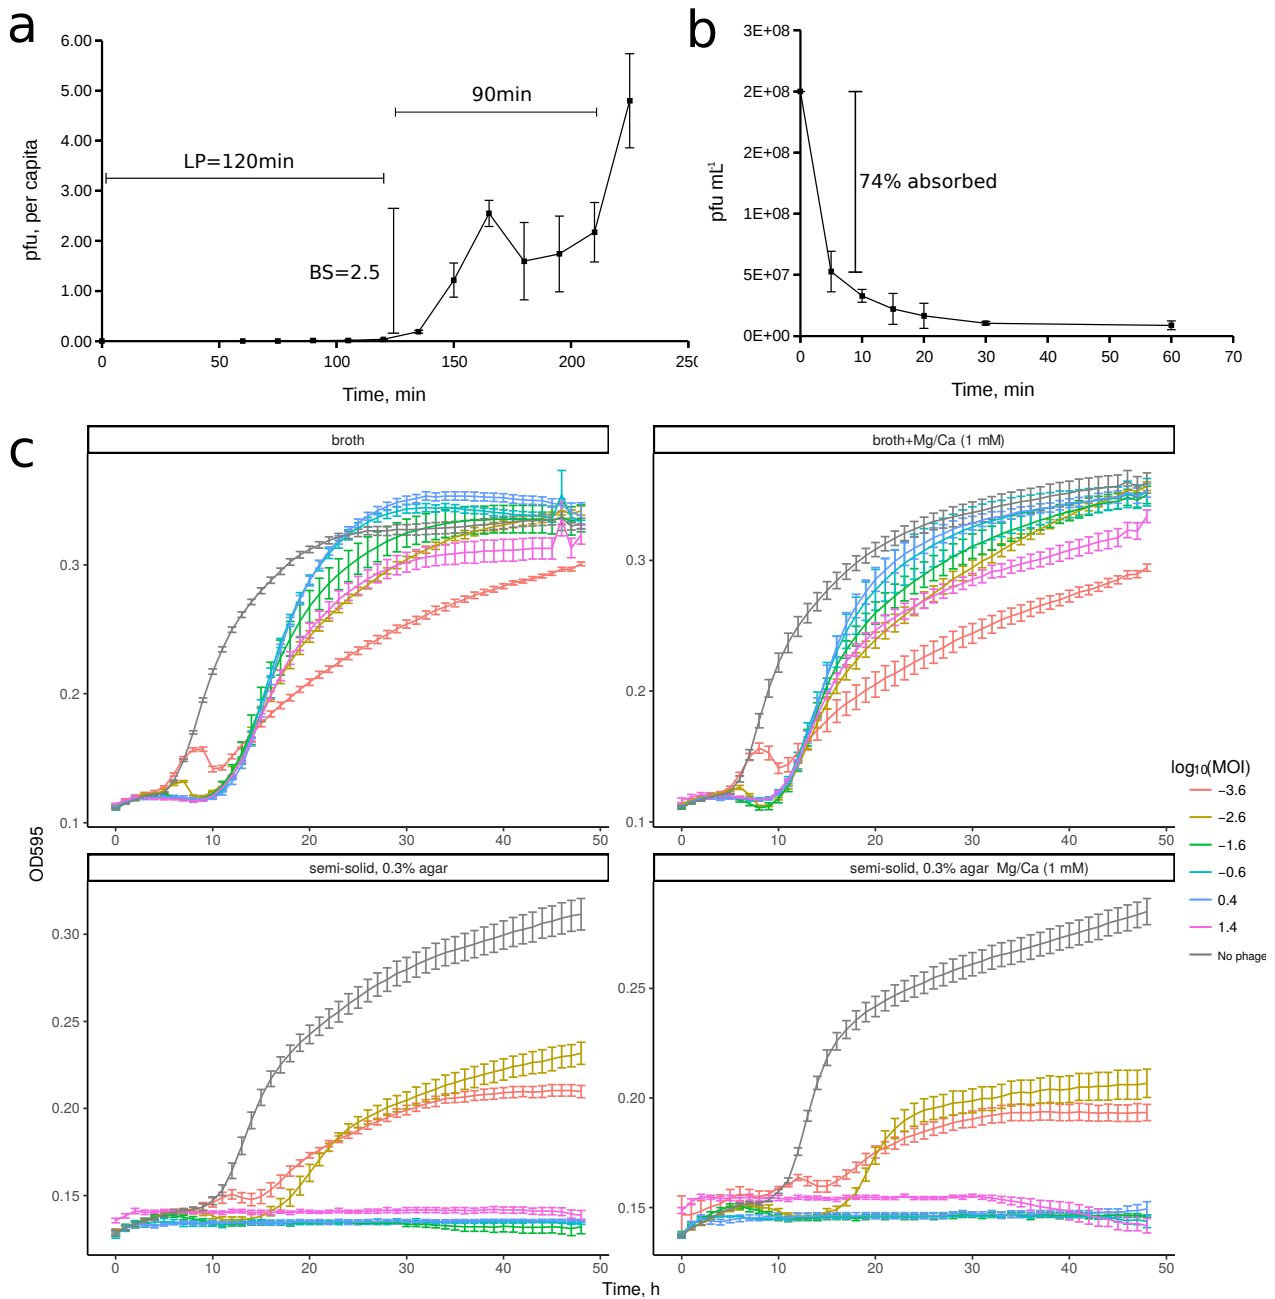

**Supplementary Figure 3. Biological properties of  $\Phi$ CrAss001.** **A**, one-step growth curve of  $\Phi$ CrAss001 (pfu *per capita*, mean $\pm$ SD of four biological replicates) in early log-phase culture *B. intestinalis* 919/174 ( $OD_{600} = 0.2$  at inoculation, MOI = 0.7); LP, latency period; BS, burst size (see text for details); **B**, adsorption curve of  $\Phi$ CrAss001 (pfu/ml, mean $\pm$ SD of three biological replicates) on early-log phase *B. intestinalis* 919/174 cells in FAB medium (MOI = 0.7); **C**, growth curves of *B. intestinalis* 919/174 ( $OD_{600}$ , mean $\pm$ SD of three biological replicates) infected at the early-log growth phase ( $OD_{600} = 0.2$  at inoculation) with different MOI levels of  $\Phi$ CrAss001 (MOI  $\sim$  0.00025 – 25).

### Supplementary References

1. Manrique, P. *et al.* Healthy human gut phageome. *Proc. Natl. Acad. Sci. U. S. A.* **113**, 10400–10405 (2016).
2. Norman, J. M. *et al.* Disease-specific Alterations in the Enteric Virome in Inflammatory Bowel Disease. *Cell* **160**, 447–460 (2015).
3. Reyes, A. *et al.* Gut DNA viromes of Malawian twins discordant for severe acute malnutrition. *Proc. Natl. Acad. Sci. U. S. A.* **112**, 11941–11946 (2015).
