# Supplementary material for: ΦCrAss001 represents the most abundant bacteriophage family in the human gut and infects Bacteroides intestinalis
Source: PubMed Central journal article supplement (PMC6235969; doi:10.1038/s41467-018-07225-7), 2018-11-14
Supplement: 41467_2018_7225_MOESM3_ESM.pdf [file 41467_2018_7225_MOESM3_ESM.pdf]

### **Description of Additional Supplementary Files**

File Name: Supplementary Data 1

Description: List of strains used for enrichment experiments in the isolation of  $\phi$ crAss001

File Name: Supplementary Data 2

Description: HHPRED annotation results for gene products predicted in  $\phi$ crAss001

File Name: Supplementary Data 3

Description: HHPRED annotation results for gene products predicted in contig Fferm\_ms\_2
